# Supplementary material
Source: PubMed Central journal article supplement (PMC2848116)

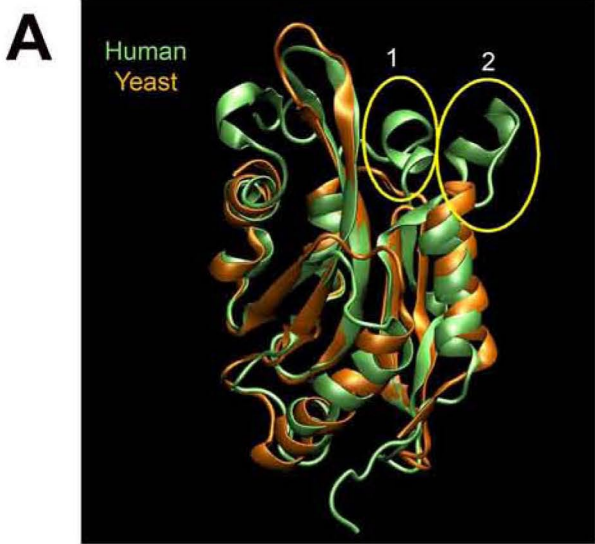

**B**

**Insert 1**

RFP

**Insert 2**

RFP

```

1  MSRSGVAVADESLTAFNDLKLG-----KKYKFILFGLNDAKTEIVVKE--TST--- YeastCof1
1  MA-SGVAVSDGVIKVFNDMKVRKSSTPPEEVKKRKKAVLFCLSEDKKNIILEEGKEILVGD HsCofilin1

47 -----DPSYDAFLEKLPENDCLYAIYDFEYEINGNEGKRSKIVFFTWSPDTAPVRSKMVY YeastCof1
60 VGQTVDDPYATFVKMLPDKDCRYALYDATYETK--ESKKEDLVFIFWAPESAPLKSKMIY HsCofilin1

102 ASSKDALRRALNGVSTDVQGTDFSEVSYDSVLERVSRG-----AGSH YeastCof1
118 ASSKDAIKKLTGIIKHELQANCYEEVKDRCTLAEKLGGSAVISLEGKPL HsCofilin1
  
```

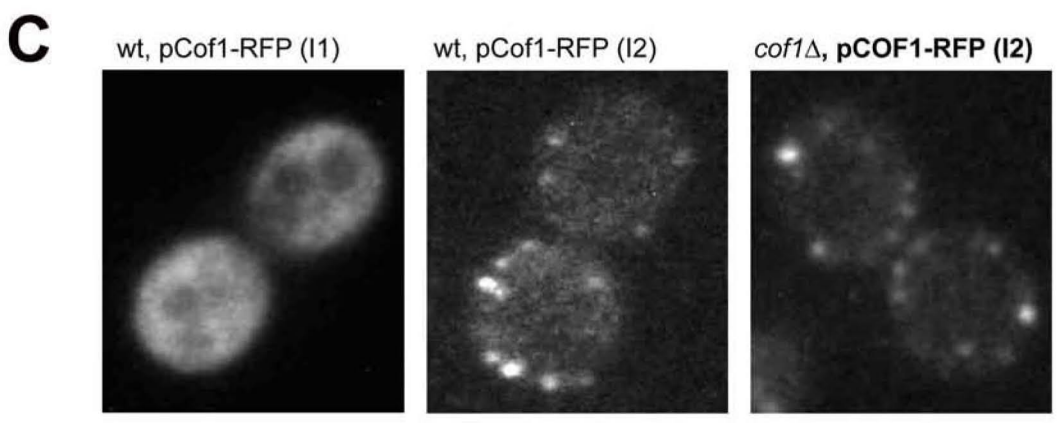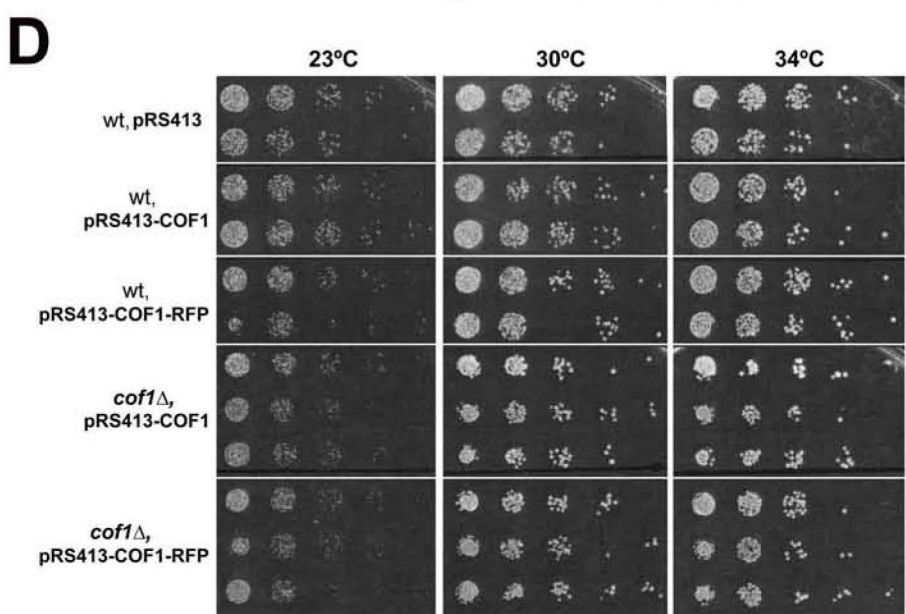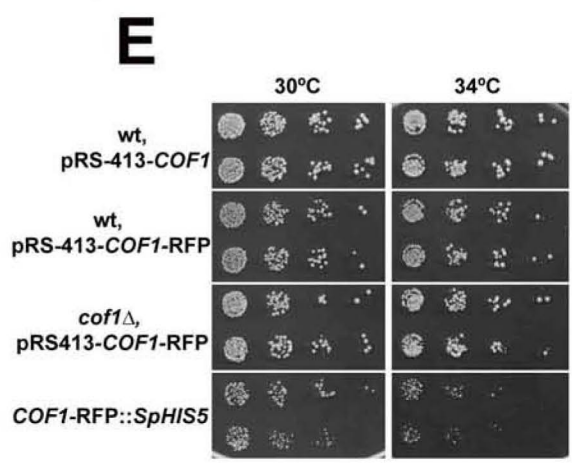

Supplement: jcs.065698_1.pdf [file jcs.065698_1.pdf]
