# Supplementary material
Source: PubMed Central journal article supplement (PMC2848116)
Supplement: jcs.065698_4.pdf [file jcs.065698_4.pdf]

Table S1. Yeast strains used in this study.

| <u>Number</u> | <u>Genotype</u>                                                                                                  |
|---------------|------------------------------------------------------------------------------------------------------------------|
| YJC4427       | <i>MAT_ ABP1-GFP::HIS3 cof1-22::LEU2 his3Δ leu2 met15Δ0 ura3</i>                                                 |
| YJC4428       | <i>MATa ABP1-GFP::HIS3 cof1-22::LEU2 his3Δ leu2 lys2 ura3</i>                                                    |
| YJC4429       | <i>MATa ABP1-GFP::HIS3 cof1-22::LEU2 his3Δ leu2 lys2 met15Δ0 ura3</i>                                            |
| YJC4439       | <i>MAT_ ABP1-GFP::HIS3 cof1-5::LEU2 his3Δ leu2 ura3</i>                                                          |
| YJC4440       | <i>MATa ABP1-GFP::HIS3 cof1-5::LEU2 his3Δ leu2 ura3 met15Δ0</i>                                                  |
| YJC4441       | <i>MATa ABP1-GFP::HIS3 cof1-5::LEU2 his3Δ leu2 ura3 met15Δ0</i>                                                  |
| YJC5843       | <i>MAT_ ABP1-GFP::HIS3 his3Δ1 leu2Δ0 lys2Δ0 met15Δ0 ura3Δ0 CRN1-tdimer2:: Kan<sup>R</sup>MX6</i>                 |
| YJC6343       | <i>MATa/_ his3Δ1/his3Δ1 leu2Δ0/leu2Δ0 ura3Δ0/ura3Δ0 met15Δ0/MET15 lys2Δ0/LYS2 cof1Δ::Kan<sup>R</sup>MX4/COF1</i> |
| YJC6408       | <i>MAT_ his3Δ1 leu2Δ0 lys2Δ0 met15Δ0 ura3Δ0 CRN1-GFP::HIS3 aip1Δ::Kan<sup>R</sup>MX4</i>                         |
| YJC6426       | <i>MAT_ his3Δ1 leu2Δ0 ura3Δ0 cof1Δ::Kan<sup>R</sup>MX4 pRS413(HIS3)-COF1-RFP</i>                                 |
| YJC6428       | <i>MAT_ his3Δ1 leu2Δ0 lys2Δ0 ura3Δ0 cof1Δ::Kan<sup>R</sup>MX4 pRS415(LEU2)-COF1-RFP</i>                          |
| YJC6430       | <i>MAT_ his3Δ1 leu2Δ0 ura3Δ0 cof1Δ::Kan<sup>R</sup>MX4 pRS416(URA3)-COF1-RFP</i>                                 |
| YJC6432       | <i>MAT_ his3Δ1 leu2Δ0 ura3Δ0 ABP1-GFP::HIS3 cof1-5::LEU2 CRN1-tdimer2::Kan<sup>R</sup>MX6</i>                    |
| YJC6441       | <i>MATa his3 leu2 lys2 met15 ura3 ABP1-GFP::HIS3 cof1-22::LEU2 CRN1-tdimer2::Kan<sup>R</sup>MX6</i>              |
| YJC6444       | <i>MATa his3Δ1 leu2Δ0 lysΔ0 met15Δ0 ura3Δ0 AIP1-GFP::HIS3MX6</i>                                                 |
| YJC6449       | <i>MAT_ his3Δ1 leu2Δ0 met15Δ0 ura3Δ0 crn1Δ::Kan<sup>R</sup>MX4 AIP1-GFP::HIS3MX6</i>                             |
| YJC6500       | <i>MAT_ his3Δ leu2Δ met15Δ ura3Δ crn1Δ::HIS3 aip1Δ::Kan<sup>R</sup>MX4</i>                                       |
| YJC6503       | <i>MAT_ his3Δ leu2Δ ura3Δ aip1Δ::Kan<sup>R</sup>MX4</i>                                                          |
| YJC6512       | <i>MATa his3Δ leu2Δ lys2Δ0 ura3Δ cof1-4::LEU2 ABP1-GFP::HIS3 CRN1-tdimer2::Kan<sup>R</sup>MX6</i>                |
| YJC6515       | <i>MAT_ his3Δ leu2Δ lys2Δ0 ura3Δ cof1-4::LEU2 ABP1-GFP::HIS3</i>                                                 |
| YJC6516       | <i>MAT_ his3Δ leu2Δ lys2Δ0 ura3Δ ABP1-GFP::HIS3</i>                                                              |
| YJC6519       | <i>MATa his3Δ leu2Δ met15Δ0 ura3Δ cof1-4::LEU2 ABP1-GFP::HIS3</i>                                                |
| YJC6520       | <i>MAT_ his3Δ leu2Δ lys2 met15Δ0 ura3Δ cof1-4::LEU2 ABP1-GFP::HIS3</i>                                           |
| YJC6521       | <i>MAT_ his3Δ leu2Δ lys2Δ met15Δ0 ura3Δ ABP1-GFP::HIS3</i>                                                       |
| YJC6522       | <i>MAT_ his3Δ leu2Δ met15Δ0 ura3Δ ABP1-GFP::HIS3</i>                                                             |
| YJC6534       | <i>MAT_ his3Δ leu2Δ ura3Δ cof1-15::LEU2 ABP1-GFP::HIS3 CRN1-tdimer2::Kan<sup>R</sup>MX6</i>                      |
| YJC6536       | <i>MAT_ his3Δ leu2Δ ura3Δ cof1-15::LEU2 ABP1-GFP::HIS3</i>                                                       |
| YJC6537       | <i>MATa his3Δ leu2Δ lys2Δ0 ura3Δ ABP1-GFP::HIS3</i>                                                              |
| YJC6538       | <i>MAT_ his3Δ leu2Δ ura3Δ ABP1-GFP::HIS3</i>                                                                     |

YJC6541 *MATa his3Δ leu2Δ lys2Δ ura3Δ cof1-15::LEU2 ABP1-GFP::HIS3*  
YJC6542 *MAT\_ his3Δ leu2Δ lys2Δ ura3Δ cof1-15::LEU2 ABP1-GFP::HIS3*  
YJC6543 *MATa his3Δ leu2Δ lys2Δ ura3Δ ABP1-GFP::HIS3*  
YJC6545 *MAT\_ his3Δ leu2Δ met15Δ0 ura3Δ cof1-19::Leu2 ABP1-GFP::HIS3 CRN1-tdimer2::Kan<sup>R</sup>MX6*  
YJC6606 *MATa his3 leu2 lys2 ura3 cof1-4::LEU2 AIP1-GFP::HIS3MX6 CRN1-tdimer2::Kan<sup>R</sup>MX6*  
YJC6616 *MATa his3 leu2 lys2 met 15 ura3 AIP1-GFP::HIS3MX6 CRN1-tdimer2::Kan<sup>R</sup>MX6*  
YJC6668 *MATa his3 leu2 lys2 ura3 cof1-15::LEU2 AIP1-GFP::HIS3MX6 CRN1-tdimer2::Kan<sup>R</sup>MX6*  
YJC6688 *MATa his3 leu2 lys2 ura3 cof1-19::LEU2 AIP1-GFP::HIS3MX6 CRN1-tdimer2::Kan<sup>R</sup>MX6*  
YJC6707 *MATa ade2 his3 leu2 lys2 ura3 cof1-22::LEU2 AIP1-GFP::HIS3MX6 CRN1-tdimer2::Kan<sup>R</sup>MX6*  
YJC6725 *MATa CSE4-GFP-SpHIS5 his3Δ1 leu2Δ0 met15Δ0 ura3Δ0*  
YJC6726 *MAT\_ CSE4-GFP-SpHIS5 his3Δ1 leu2Δ0 met15Δ0 ura3Δ0*  
YJC6779 *MATa his3Δ leu2Δ lys2Δ0 ura3Δ ABP1-GFP::HIS3 crn1Δ::URA3MX4*  
YJC6780 *MAT\_ his3Δ leu2Δ ura3Δ ABP1-GFP::HIS3 crn1Δ::URA3MX4*  
YJC6781 *MATa his3Δ leu2Δ lys2Δ ura3Δ ABP1-GFP::HIS3 crn1Δ::URA3MX4*  
YJC6782 *MATa his3Δ leu2Δ lys2Δ0 ura3Δ ABP1-GFP::HIS3 aip1Δ::URA3MX4*  
YJC6783 *MAT\_ his3Δ leu2Δ ura3Δ ABP1-GFP::HIS3 aip1Δ::URA3MX4*  
YJC6784 *MATa his3Δ leu2Δ lys2Δ ura3Δ ABP1-GFP::HIS3 aip1Δ::URA3MX4*  
YJC6785 *MATa his3Δ leu2Δ lys2Δ0 ura3Δ ABP1-GFP::HIS3 cof1-19::LEU2*  
YJC6786 *MAT\_ his3Δ leu2Δ ura3Δ ABP1-GFP::HIS3 cof1-19::LEU2*  
YJC6787 *MATa his3Δ leu2Δ lys2Δ ura3Δ ABP1-GFP::HIS3 cof1-19::LEU2*  
YJC6816 *MATa his3Δ leu2Δ lys2Δ0 ura3Δ ABP1-GFP::HIS3 crn1Δ::CaURA3 aip1Δ::Kan<sup>R</sup> MX6*  
YJC6817 *MATa his3Δ leu2Δ lys2Δ0 ura3Δ ABP1-GFP::HIS3 crn1Δ::CaURA3 aip1Δ::Kan<sup>R</sup> MX6*  
YJC6818 *MAT\_ his3Δ leu2Δ ura3Δ ABP1-GFP::HIS3 crn1Δ::CaURA3 aip1Δ::Kan<sup>R</sup>MX6*  
YJC6823 *MATa his3Δ leu2Δ0 met15Δ0 ura3Δ0/ura3Δ0 SPC105-RFP::SpHIS5*  
YJC6824 *MAT\_ his3Δ leu2Δ0 met15Δ0 ura3Δ0/ura3Δ0 SPC105-RFP::SpHIS5*  
YJC6825 *MAT\_ cof1Δ::URA3 his3Δ leu2Δ0 met15Δ0 ura3Δ0 pRS413(HIS3)-COF1-RFP*  
YJC6826 *MATa cof1Δ::URA3 his3Δ leu2Δ0 met15Δ0 ura3Δ0 pRS413(HIS3)-COF1-RFP*  
YJC6827 *MATa cof1Δ::URA3 his3Δ leu2Δ0 met15Δ0 ura3Δ0 pRS413(HIS3)-COF1-RFP*  
YJC6832 *MAT\_ AIP1-GFP-SpHIS5 his3Δ1 leu2Δ0 met15Δ0 ura3Δ0*  
YJC6833 *MATa AIP1-GFP-SpHIS5 his3Δ1 leu2Δ0 met15Δ0 ura3Δ0*  
YJC6834 *MATa AIP1-GFP-SpHIS5 his3Δ1 leu2Δ0 met15Δ0 ura3Δ0*  
YJC6836 *MAT\_ CRN1-GFP-SpHIS5 his3Δ1 leu2Δ0 met15Δ0 ura3Δ0*

YJC6837 MATa CRN1-GFP-SpHIS5 his3Δ1 leu2Δ0 met15Δ0 ura3Δ0  
 YJC6838 MATa CRN1-GFP-SpHIS5 his3Δ1 leu2Δ0 met15Δ0 ura3Δ  
 YJC6881 MAT\_ his3Δ leu2Δ met15Δ0 ura3Δ SLA2-GFP::HIS3 cof1-19::LEU2  
 YJC6882 MATa his3Δ leu2Δ ura3Δ SLA2-GFP::HIS3 cof1-19::LEU2  
 YJC6883 MAT\_ his3Δ leu2Δ met15Δ0 ura3Δ SLA2-GFP::HIS3 cof1-19::LEU2  
 YJC6884 MAT\_ his3Δ leu2Δ ade2-101 lys2Δ ura3Δ SLA2-GFP::SpHIS5  
 YJC6885 MATa his3Δ leu2Δ ade2-101 lys2Δ ura3Δ SLA2-GFP::SpHIS5  
 YJC6886 MATa his3Δ leu2Δ ade2-101 lys2Δ ura3Δ SLA2-GFP::SpHIS5  
 YJC6888 MATa his3Δ leu2Δ ade2-101 lys2Δ ura3Δ SLA2-GFP::SpHIS5 cof1-22::LEU2  
 YJC6889 MAT\_ his3Δ leu2Δ ade2-101 lys2Δ ura3Δ SLA2-GFP::SpHIS5 cof1-22::LEU2  
 YJC6890 MATa his3Δ leu2Δ ade2-101 lys2Δ ura3Δ SLA2-GFP::SpHIS5 cof1-22::LEU2  
 YJC6891 MATa his3Δ leu2Δ ade2-101 lys2Δ ura3Δ SLA2-GFP::SpHIS5 aip1Δ::CaURA3  
 YJC6892 MATa his3Δ leu2Δ ade2-101 lys2Δ ura3Δ SLA2-GFP::SpHIS5 aip1Δ::CaURA3  
 YJC6893 MATa his3Δ leu2Δ lys2Δ801 ura3Δ SLA2-GFP::HIS3 aip1Δ::Kan<sup>R</sup>MX6  
 YJC6900 MAT\_ his3Δ leu2 met15Δ0 ura3 cof1-15::LEU2 SLA2-GFP::HIS3  
 YJC6901 MATa his3Δ leu2 lys2-801 ura3 cof1-15::LEU2 SLA2-GFP::HIS3  
 YJC6902 MATa his3Δ leu2 lys2-801 met15Δ0 ura3 cof1-15::LEU2 SLA2-GFP::HIS3  
 YJC6920 MATa his3Δ leu2 lys2 met15Δ0 ura3\_ cof1-15::LEU2 crn1\_::CaURA3 ABP1-GFP::HIS3  
 YJC6921 MAT\_ his3Δ leu2 lys2 met15Δ0 ura3\_ cof1-15::LEU2 crn1\_::CaURA3 ABP1-GFP::HIS3  
 YJC6922 MAT\_ his3Δ leu2 lys2 met15Δ0 ura3\_ cof1-15::LEU2 crn1\_::CaURA3 ABP1-GFP::HIS3  
 YJC6923 MAT\_ his3Δ leu2 lys2 met15Δ0 ura3\_ cof1-19::LEU2 aip1\_::CaURA3 ABP1-GFP::HIS3  
 YJC6924 MATa his3Δ leu2 lys2 met15Δ0 ura3\_ cof1-19::LEU2 aip1\_::CaURA3 ABP1-GFP::HIS3  
 YJC6925 MAT\_ his3Δ leu2 lys2 met15Δ0 ura3\_ cof1-19::LEU2 aip1\_::CaURA3 ABP1-GFP::HIS3  
 cof1\_::Kan<sup>R</sup>MX6 strains were derived from the COF1/cof1\_ strain of the *Saccharomyces* Genome Deletion Project ([www.sequence.stanford.edu/group/yeast\\_deletion\\_project/deletions3.html](http://www.sequence.stanford.edu/group/yeast_deletion_project/deletions3.html)). Other *cof1* alleles were generated by crosses from strains provided by David Drubin (Lappalainen et al., 1997). *cof1\_::URA3MX4* and all other strains were generated in this lab.
