# Supplementary material
Source: PubMed Central journal article supplement (PMC2848116)
Supplement: jcs.065698_5.pdf [file jcs.065698_5.pdf]

Table S2. Viability of tetrad spores from *cof1* $\Delta$ /*COF1* cells transformed with pRS-*COF1-RFP* or pRS-*COF1* plasmids.

| Parent Genotypes                                                                 | No. of asci dissected | No. of viable progeny | No. of viable progeny with Kan <sup>R</sup> marker | No. of viable progeny with both Kan <sup>R</sup> and pRS markers |
|----------------------------------------------------------------------------------|-----------------------|-----------------------|----------------------------------------------------|------------------------------------------------------------------|
| <i>cof1</i> $\Delta$ ::Kan <sup>R</sup> / <i>COF1</i>                            | 15                    | 27                    | 3                                                  | NA                                                               |
| <i>cof1</i> $\Delta$ ::Kan <sup>R</sup> / <i>COF1</i><br>pRS413- <i>COF1</i>     | 16                    | 49                    | 19                                                 | 19                                                               |
| <i>cof1</i> $\Delta$ ::Kan <sup>R</sup> / <i>COF1</i><br>pRS413- <i>COF1-RFP</i> | 15                    | 43                    | 12                                                 | 12                                                               |
| <i>Cof1</i> $\Delta$ ::Kan <sup>R</sup> / <i>COF1</i><br>pRS415- <i>COF1-RFP</i> | 8                     | 21                    | 7                                                  | 7                                                                |

The first column is the number of asci dissected. The numbers of viable haploid progeny are listed in the second column. The third and fourth columns list the number of those viable haploid progeny that contain markers for the *cof1* disruption and the *COF1* plasmid. NA - not applicable.
