# Supplementary material
Source: PubMed Central journal article supplement (PMC2848116)
Supplement: jcs.065698_6.pdf [file jcs.065698_6.pdf]

Table S3. Classes of *cof1* alleles based on phenotypes. The classes are described in the text. Crn1 and actin distributions were assessed in cells grown at 34°C.

| Class | Allele         | Growth phenotype | Cells with abnormal Crn1 distribution | Cells with abnormal Aip1 distribution | Actin structure morphology                     |
|-------|----------------|------------------|---------------------------------------|---------------------------------------|------------------------------------------------|
| 1     | wt             | wt               | 2% (N=789)                            | 3% (N=72)                             | wt                                             |
| 1     | <i>cof1-6</i>  | wt               | 4 % (N=640)                           | 4% (N=52)                             | wt                                             |
| 1     | <i>cof1-11</i> | wt               | 3 % (N=846)                           | 5% (N=49)                             | wt                                             |
| 1     | <i>cof1-12</i> | wt               | 2 % (N=606)                           | 2% (N=55)                             | wt                                             |
| 1     | <i>cof1-13</i> | wt               | 11 % (N=641)                          | 5% (N=124)                            | wt                                             |
| 1     | <i>cof1-21</i> | wt               | 6% (N=532)                            | 6% (N=181)                            | wt                                             |
| 2     | <i>cof1-15</i> | wt               | 69 % (N=903)                          | 3% (N=234)                            | wt                                             |
| 3     | <i>cof1-5</i>  | ts               | 40 % (N=794)                          | 22% (N=27)                            | Thickened actin cables and large actin patches |
| 4     | <i>cof1-4</i>  | wt               | 48% (N=345)                           | 3% (N=135)                            | Slightly increased actin structures            |
| 4     | <i>cof1-22</i> | ts               | 80% (N=411)                           | 11% (N=68)                            | Thickened actin cables and large actin patches |
| 5     | <i>cof1-19</i> | wt               | 39% (N=544)                           | 97% (N=87)                            | Slightly increase actin structures             |
