# Supplementary material
Source: PubMed Central journal article supplement (PMC2848116)

**A****Sla2-GFP**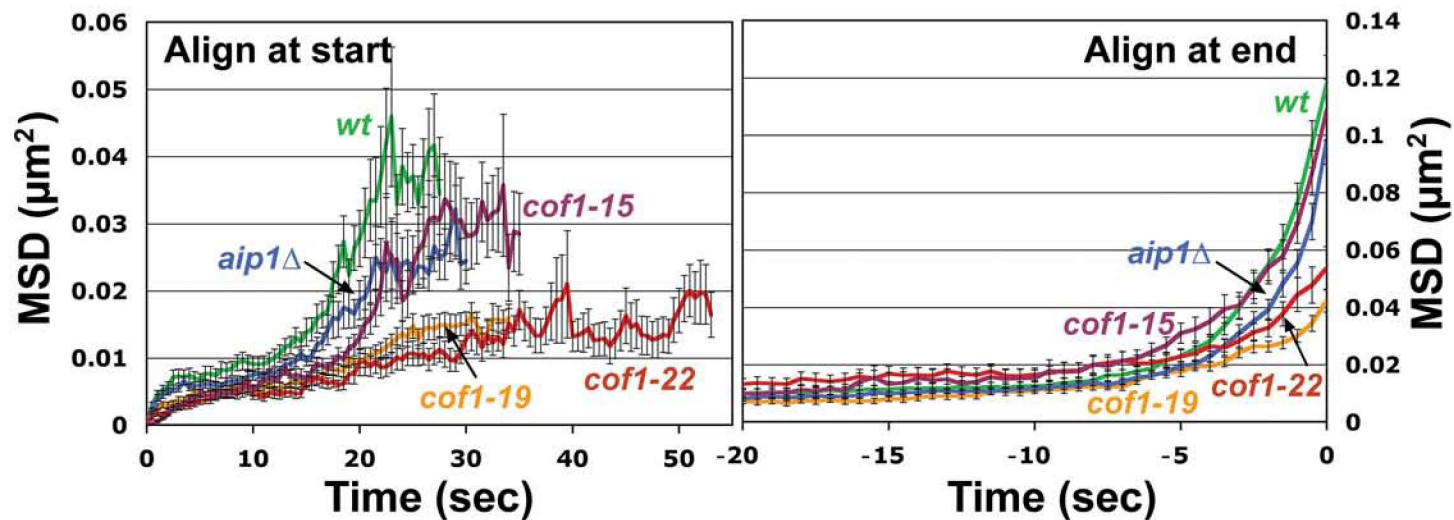**B**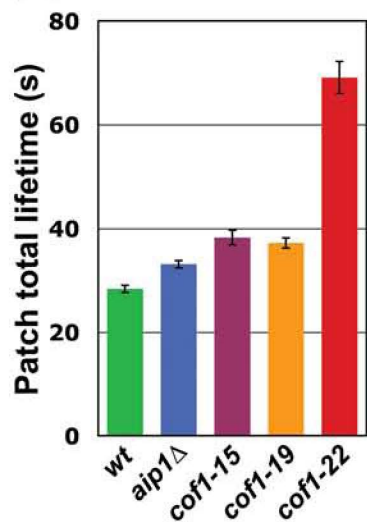**C**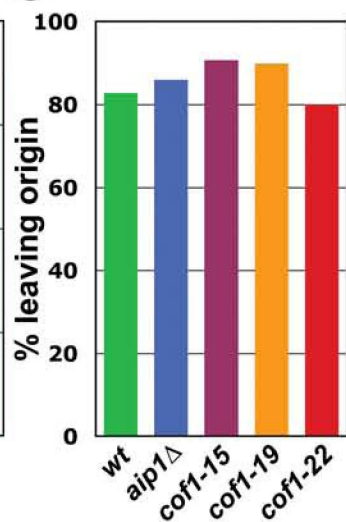**D**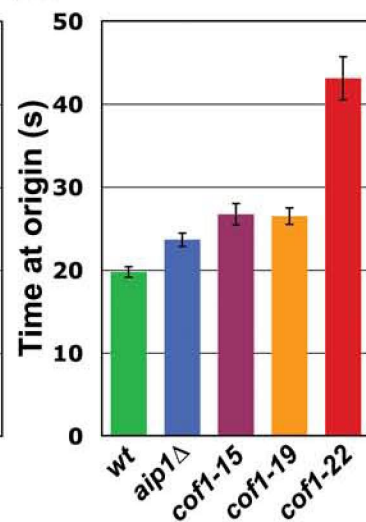**E**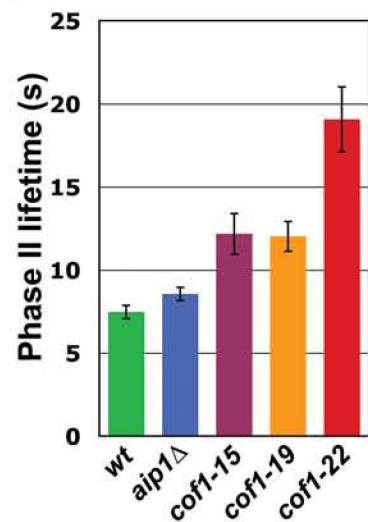**F****Sla2-GFP Phase II only**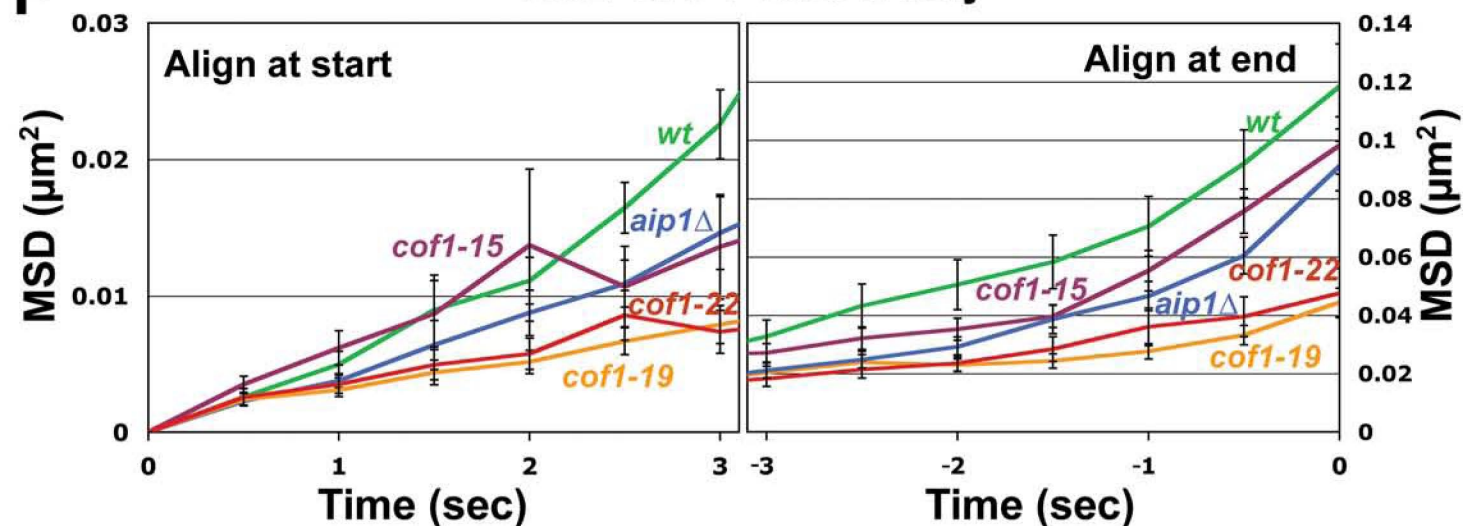

Supplement: jcs.065698_2.pdf [file jcs.065698_2.pdf]

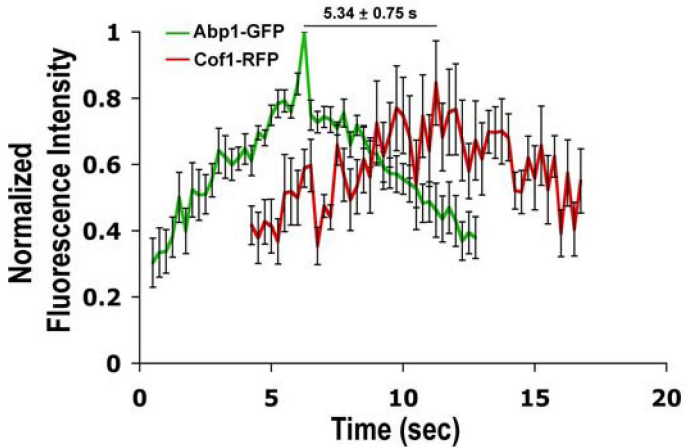

Supplement: jcs.065698_3.pdf [file jcs.065698_3.pdf]
